# Supplementary material for: Triel Bond Formed by Malondialdehyde and Its Influence on the Intramolecular H-Bond and Proton Transfer
Source: MDPI journal article supplement (doi:10.3390/molecules27186091), 2022-09-18
Supplement: s1 [file s1]

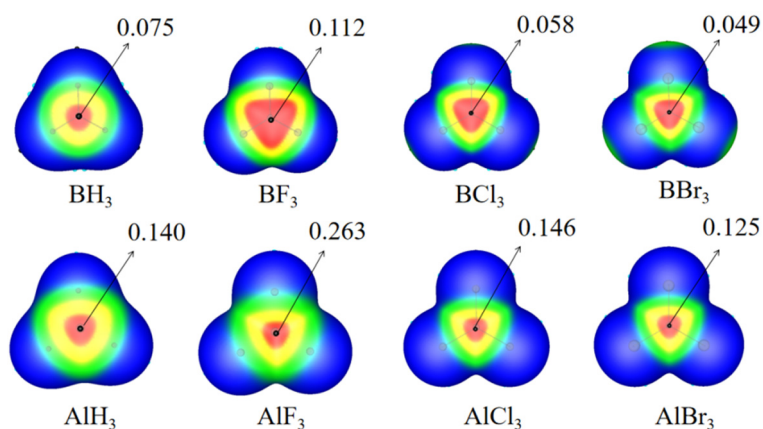

**Figure S1.** MEP maps of  $\text{TrX}_3$ . Color ranges are: red, greater than 0.02; yellow, between 0.02 and 0; green, between -0.02 and 0; blue, less than -0.02. All are in a.u.

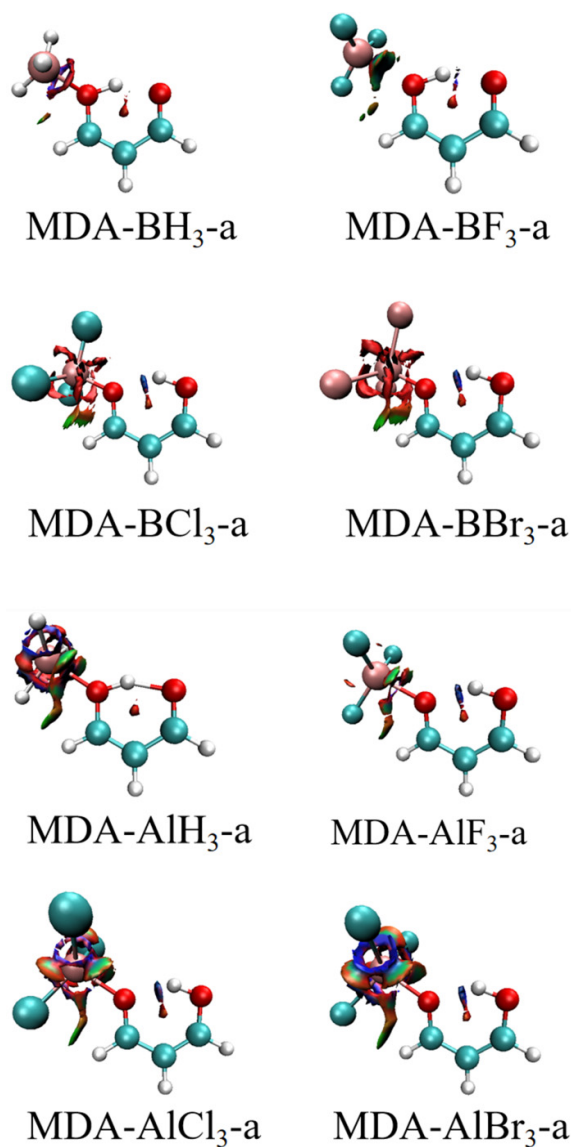

**Figure S2.** NCI diagram of binary complex formed by the hydroxyl O with  $\text{TrX}_3$ . Blue, green, and red areas represent strong attraction, weak attraction, and strong repulsion, respectively. Diagrams are drawn by the Multiwfn and the VMD programs

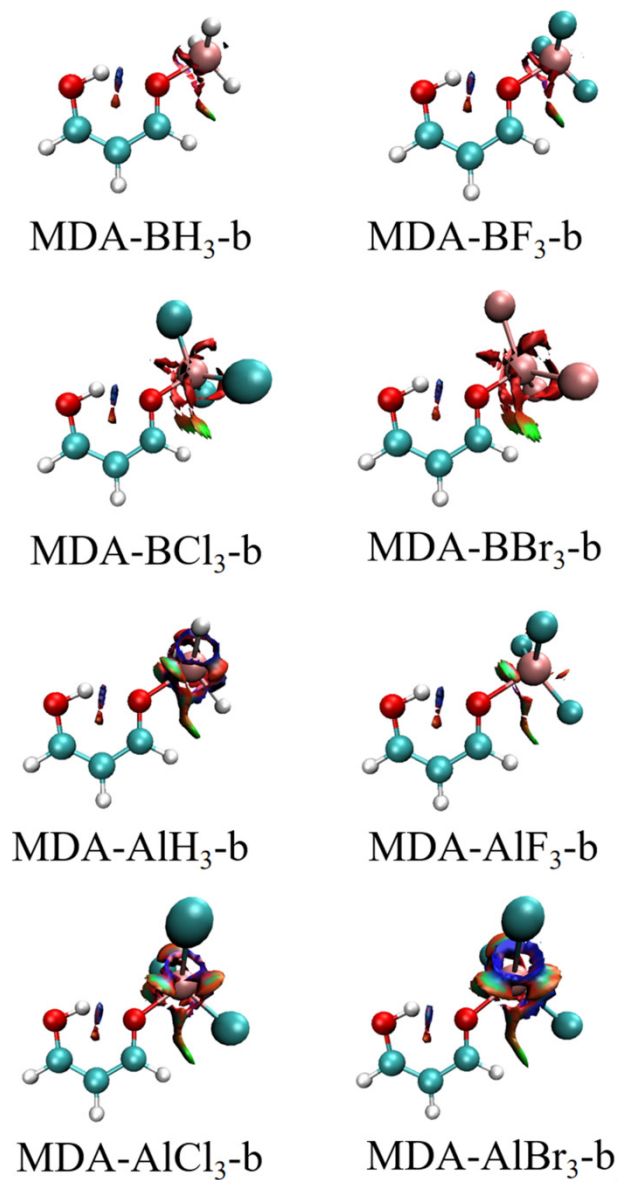

**Figure S3.** NCI diagram of binary complex of MDA formed by the carbonyl O with TrX<sub>3</sub>. Blue, green, and red areas represent strong attraction, weak attraction, and strong repulsion, respectively.

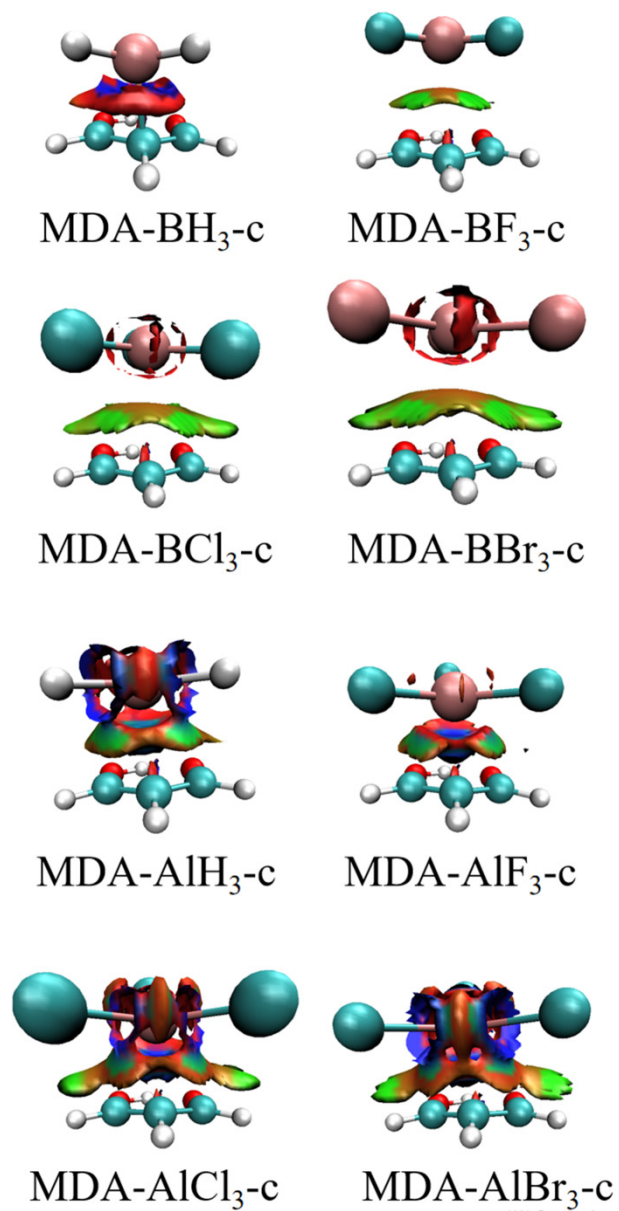

**Figure S4.** NCI diagram of  $\pi$ - $\pi$  structures formed by the carbon center of MDA with TrX<sub>3</sub>. Blue, green, and red areas represent strong attraction, weak attraction, and strong repulsion, respectively.

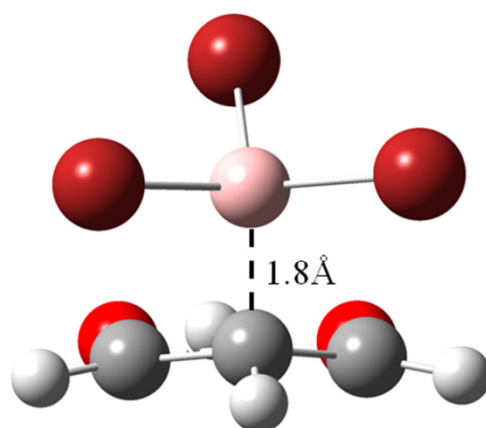

33.64 kcal/mol

**Figure S5.** Structure of MDA-BBr<sub>3</sub>-c at a B...C distance of 1.8 Å.

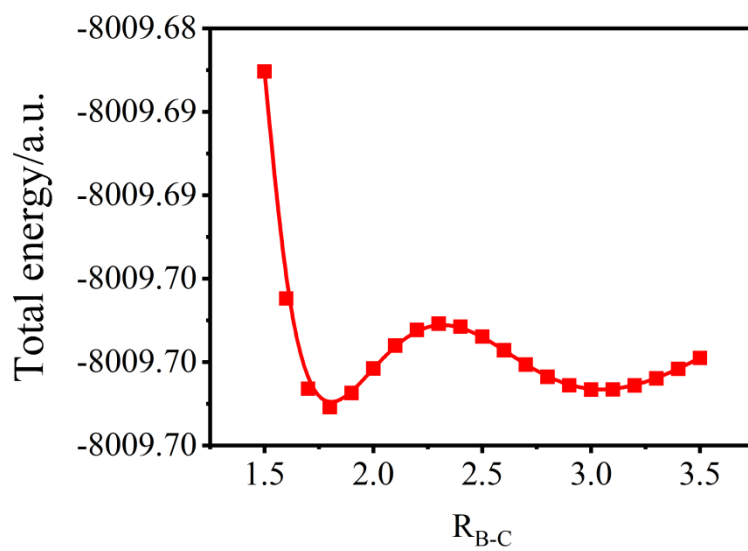

**Figure S6.** The energy curve of MDA-BBr<sub>3</sub>-c by changing the B...C distance from 1.5 to 3.5 Å

**Table S1.** Charge transfer (CT, e) in the complexes

|                                          | CT    |
|------------------------------------------|-------|
| MDA-BH <sub>3</sub> -a                   | 0.211 |
| MDA-BF <sub>3</sub> -a                   | 0.040 |
| MDA-BCl <sub>3</sub> -a                  | 0.294 |
| MDA-BBr <sub>3</sub> -a                  | 0.286 |
| MDA-AlH <sub>3</sub> -a                  | 0.101 |
| MDA-AlF <sub>3</sub> -a                  | 0.108 |
| MDA-AlCl <sub>3</sub> -a                 | 0.131 |
| MDA-AlBr <sub>3</sub> -a                 | 0.127 |
| MDA-BH <sub>3</sub> -b                   | 0.250 |
| MDA-BF <sub>3</sub> -b                   | 0.220 |
| MDA-BCl <sub>3</sub> -b                  | 0.294 |
| MDA-BBr <sub>3</sub> -b                  | 0.286 |
| MDA-AlH <sub>3</sub> -b                  | 0.115 |
| MDA-AlF <sub>3</sub> -b                  | 0.108 |
| MDA-AlCl <sub>3</sub> -b                 | 0.131 |
| MDA-AlBr <sub>3</sub> -b                 | 0.127 |
| MDA-BH <sub>3</sub> -c                   | 0.268 |
| MDA-BF <sub>3</sub> -c                   | 0.010 |
| MDA-BCl <sub>3</sub> -c                  | 0.015 |
| MDA-BBr <sub>3</sub> -c                  | 0.022 |
| MDA-AlH <sub>3</sub> -c                  | 0.112 |
| MDA-AlF <sub>3</sub> -c                  | 0.120 |
| MDA-AlCl <sub>3</sub> -c                 | 0.160 |
| MDA-AlBr <sub>3</sub> -c                 | 0.162 |
| BH <sub>2</sub> -MDA-BH <sub>3</sub> -a  | 0.244 |
| BH <sub>2</sub> -MDA-BF <sub>3</sub> -a  | 0.022 |
| BH <sub>2</sub> -MDA-AlH <sub>3</sub> -a | 0.112 |

Note: CT is calculated as a sum of NBO charge on the each atom in TrX<sub>3</sub>

**Table S2.** Electrostatic ( $E^{\text{ele}}$ ), exchange ( $E^{\text{ex}}$ ), repulsion ( $E^{\text{rep}}$ ), polarization ( $E^{\text{pol}}$ ), and dispersion energies ( $E^{\text{disp}}$ ) as well as the total interaction energy ( $\Delta E^{\text{total}}$ ) of triel bond in the binary complexes. All are in kcal/mol.

|                          | $E^{\text{ele}}$ | $E^{\text{ex}}$ | $E^{\text{rep}}$ | $E^{\text{pol}}$ | $E^{\text{disp}}$ | $\Delta E^{\text{total}}$ |
|--------------------------|------------------|-----------------|------------------|------------------|-------------------|---------------------------|
| MDA-BH <sub>3</sub> -a   | -44.69           | -75.99          | 146.59           | -37.48           | -8.52             | -20.09                    |
| MDA-BF <sub>3</sub> -a   | -17.34           | -20.88          | 39.94            | -7.64            | -1.64             | -7.56                     |
| MDA-BCl <sub>3</sub> -a  | -92.89           | -142.70         | 287.76           | -87.74           | -2.07             | -37.64                    |
| MDA-BBr <sub>3</sub> -a  | -102.76          | -163.77         | 329.93           | -99.07           | -2.52             | -38.19                    |
| MDA-AlH <sub>3</sub> -a  | -38.42           | -41.82          | 81.68            | -20.46           | -2.37             | -21.39                    |
| MDA-AlF <sub>3</sub> -a  | -59.70           | -36.82          | 80.60            | -32.93           | 6.19              | -42.65                    |
| MDA-AlCl <sub>3</sub> -a | -65.42           | -60.15          | 121.92           | -40.16           | 1.80              | -42.01                    |
| MDA-AlBr <sub>3</sub> -a | -68.46           | -70.01          | 139.90           | -43.03           | 1.02              | -40.58                    |
| MDA-BH <sub>3</sub> -b   | -57.90           | -91.72          | 177.72           | -49.43           | -7.52             | -28.86                    |
| MDA-BF <sub>3</sub> -b   | -63.33           | -76.70          | 157.53           | -50.10           | 3.09              | -29.50                    |
| MDA-BCl <sub>3</sub> -b  | -92.89           | -142.70         | 287.76           | -87.74           | -2.07             | -37.64                    |
| MDA-BBr <sub>3</sub> -b  | -102.76          | -163.77         | 329.93           | -99.07           | -2.52             | -38.19                    |
| MDA-AlH <sub>3</sub> -b  | -48.59           | -48.16          | 94.71            | -25.40           | 0.02              | -27.42                    |
| MDA-AlF <sub>3</sub> -b  | -59.70           | -36.82          | 80.60            | -32.93           | 6.19              | -42.65                    |
| MDA-AlCl <sub>3</sub> -b | -65.42           | -60.15          | 121.92           | -40.16           | 1.80              | -42.01                    |
| MDA-AlBr <sub>3</sub> -b | -68.46           | -70.01          | 139.90           | -43.03           | 1.02              | -40.58                    |
| MDA-BH <sub>3</sub> -c   | -39.97           | -91.42          | 169.88           | -43.18           | -13.80            | -18.49                    |
| MDA-BF <sub>3</sub> -c   | -5.71            | -10.74          | 19.86            | -2.32            | -3.92             | -2.82                     |
| MDA-BCl <sub>3</sub> -c  | -5.57            | -16.31          | 27.88            | -1.99            | -8.23             | -4.22                     |
| MDA-BBr <sub>3</sub> -c  | -7.74            | -23.58          | 40.29            | -2.89            | -10.51            | -4.42                     |
| MDA-AlH <sub>3</sub> -c  | -22.86           | -40.61          | 75.82            | -17.75           | -6.96             | -12.36                    |
| MDA-AlF <sub>3</sub> -c  | -30.26           | -35.29          | 74.60            | -28.88           | -2.41             | -22.24                    |
| MDA-AlCl <sub>3</sub> -c | -38.09           | -60.47          | 118.27           | -35.22           | -8.83             | -24.34                    |
| MDA-AlBr <sub>3</sub> -c | -42.10           | -71.83          | 138.66           | -37.95           | -10.53            | -23.74                    |

|                  |             |             |             |
|------------------|-------------|-------------|-------------|
| MDA              |             |             |             |
| C                | 1.17962100  | 0.43638800  | -0.00020600 |
| O                | 1.28458700  | -0.88012700 | -0.00008800 |
| H                | 0.34130700  | -1.21644300 | 0.00031300  |
| C                | -0.00981600 | 1.10190500  | 0.00002200  |
| C                | -1.23353400 | 0.35282400  | 0.00034600  |
| H                | -2.17877100 | 0.91125300  | 0.00027700  |
| O                | -1.27085300 | -0.89114500 | -0.00003000 |
| H                | 2.13401000  | 0.94903900  | -0.00053800 |
| H                | -0.02404100 | 2.17962300  | -0.00007300 |
| BH <sub>3</sub>  |             |             |             |
| B                | 0.00000000  | 0.00000000  | 0.00000000  |
| H                | 0.00000000  | 1.18725200  | 0.00000000  |
| H                | 1.02819000  | -0.59362600 | 0.00000000  |
| H                | -1.02819000 | -0.59362600 | 0.00000000  |
| BF <sub>3</sub>  |             |             |             |
| B                | 0.00000000  | 0.00000000  | 0.00000000  |
| F                | 0.00000000  | 1.31702700  | 0.00000000  |
| F                | -1.14057900 | -0.65851400 | 0.00000000  |
| F                | 1.14057900  | -0.65851400 | 0.00000000  |
| BCl <sub>3</sub> |             |             |             |
| B                | 0.00000000  | 0.00000000  | 0.00000000  |
| Cl               | 0.00000000  | 1.73990400  | 0.00000000  |
| Cl               | -1.50680100 | -0.86995200 | 0.00000000  |
| Cl               | 1.50680100  | -0.86995200 | 0.00000000  |
| BBr <sub>3</sub> |             |             |             |
| B                | 0.00000000  | 0.00000000  | 0.00000000  |
| Br               | 0.00000000  | 1.88918600  | 0.00000000  |
| Br               | -1.63608300 | -0.94459300 | 0.00000000  |
| Br               | 1.63608300  | -0.94459300 | 0.00000000  |
| AlH <sub>3</sub> |             |             |             |
| Al               | 0.00000000  | 0.00000000  | 0.00000000  |
| H                | 0.00000000  | 1.57987100  | 0.00000000  |
| H                | -1.36820900 | -0.78993600 | 0.00000000  |
| H                | 1.36820900  | -0.78993600 | 0.00000000  |
| AlF <sub>3</sub> |             |             |             |
| Al               | 0.00000000  | 0.00000000  | 0.00000000  |
| F                | 0.00000000  | 1.64708700  | 0.00000000  |

|                        |             |             |             |
|------------------------|-------------|-------------|-------------|
| F                      | 1.42641900  | -0.82354300 | 0.00000000  |
| F                      | -1.42641900 | -0.82354300 | 0.00000000  |
| AlCl <sub>3</sub>      |             |             |             |
| Al                     | 0.00000000  | 0.00000000  | 0.00000000  |
| Cl                     | 0.00000000  | 2.08148000  | 0.00000000  |
| Cl                     | -1.80261500 | -1.04074000 | 0.00000000  |
| Cl                     | 1.80261500  | -1.04074000 | 0.00000000  |
| AlBr <sub>3</sub>      |             |             |             |
| Al                     | 0.00000000  | 0.00000000  | 0.00000000  |
| Br                     | 0.00000000  | 2.23184500  | 0.00000000  |
| Br                     | -1.93283500 | -1.11592300 | 0.00000000  |
| Br                     | 1.93283500  | -1.11592300 | 0.00000000  |
| MDA-BH <sub>3</sub> -a |             |             |             |
| C                      | 0.30351200  | 1.01267600  | -0.10836400 |
| O                      | 0.92839500  | -0.15878800 | -0.29534200 |
| H                      | 0.21834100  | -0.88887600 | -0.19792600 |
| C                      | -1.03768200 | 1.06825100  | 0.06504300  |
| C                      | -1.79060500 | -0.16101600 | 0.10944200  |
| H                      | -2.87027700 | -0.10599900 | 0.28521600  |
| O                      | -1.26153100 | -1.27711500 | -0.03363800 |
| H                      | 0.97384600  | 1.86107800  | -0.11693400 |
| H                      | -1.52512400 | 2.02065800  | 0.19334300  |
| B                      | 2.54254800  | -0.35748200 | 0.23261100  |
| H                      | 3.03122900  | 0.65471400  | -0.19273800 |
| H                      | 2.42322200  | -0.41588100 | 1.42534600  |
| H                      | 2.84976800  | -1.37053200 | -0.32424600 |
| MDA-BF <sub>3</sub> -a |             |             |             |
| C                      | -0.94072600 | 1.04158300  | -0.04603800 |
| O                      | -0.21083900 | -0.06873800 | -0.10633000 |
| H                      | -0.87383800 | -0.83440300 | -0.08113500 |
| C                      | -2.29736400 | 1.01656500  | 0.02241400  |
| C                      | -2.97287200 | -0.25232500 | 0.03663800  |
| H                      | -4.06761300 | -0.25833800 | 0.09533400  |
| O                      | -2.36829400 | -1.33901500 | -0.01399700 |
| H                      | -0.35331000 | 1.95022300  | -0.05984700 |
| H                      | -2.85207500 | 1.93928900  | 0.06729200  |
| B                      | 1.97480700  | -0.08071000 | 0.02194000  |
| F                      | 2.04928700  | 1.22561500  | -0.22210100 |
| F                      | 2.15259000  | -0.93923600 | -0.96924200 |
| F                      | 2.03941500  | -0.50483900 | 1.27503100  |



MDA-BCl<sub>3</sub>-a

|    |             |             |             |
|----|-------------|-------------|-------------|
| C  | 1.20789900  | -1.05049600 | -0.00057600 |
| O  | 0.58055300  | 0.05992600  | -0.00018300 |
| H  | 1.85239100  | 1.24125800  | -0.00033200 |
| C  | 2.60634200  | -1.07134500 | -0.00012100 |
| C  | 3.33395500  | 0.09766500  | -0.00005300 |
| H  | 4.41717300  | 0.08460300  | -0.00014000 |
| O  | 2.83865100  | 1.30420700  | -0.00020400 |
| H  | 0.62095200  | -1.96668100 | -0.00128900 |
| H  | 3.12685500  | -2.01415500 | 0.00009700  |
| B  | -1.00822100 | 0.07039900  | 0.00004500  |
| Cl | -1.50799200 | -0.81390700 | -1.51789300 |
| Cl | -1.40977000 | 1.83534200  | -0.00016300 |
| Cl | -1.50688900 | -0.81349600 | 1.51858800  |

MDA-BBr<sub>3</sub>-a

|    |             |             |             |
|----|-------------|-------------|-------------|
| C  | -3.88516900 | -0.02720600 | 0.00004200  |
| O  | -3.39728100 | -1.23486700 | -0.00121700 |
| H  | -2.40976500 | -1.18077500 | -0.00130900 |
| C  | -3.15241300 | 1.14091400  | 0.00109100  |
| C  | -1.75711800 | 1.11507200  | 0.00087600  |
| H  | -1.15968700 | 2.02410600  | 0.00165500  |
| O  | -1.13943400 | -0.00463000 | -0.00058900 |
| H  | -4.96837700 | -0.00826200 | 0.00033000  |
| H  | -3.67021200 | 2.08522100  | 0.00220100  |
| B  | 0.42606000  | -0.04535200 | -0.00038300 |
| Br | 1.00454200  | 0.89848800  | -1.64463000 |
| Br | 1.00449000  | 0.89696400  | 1.64518400  |
| Br | 0.82352900  | -1.97117300 | -0.00051300 |

MDA-AlH<sub>3</sub>-a

|    |             |             |             |
|----|-------------|-------------|-------------|
| C  | -0.27619700 | 1.06526800  | 0.00007700  |
| O  | 0.44238200  | -0.06663700 | 0.00007100  |
| H  | -0.25614400 | -0.83697900 | 0.00010300  |
| C  | -1.63127100 | 1.02371300  | -0.00008400 |
| C  | -2.28387900 | -0.25770900 | -0.00005500 |
| H  | -3.37739200 | -0.29603700 | -0.00008900 |
| O  | -1.64773300 | -1.32996700 | 0.00003300  |
| H  | 0.32602000  | 1.96406800  | 0.00029000  |
| H  | -2.20026800 | 1.93841800  | -0.00007600 |
| Al | 2.47816700  | -0.16398200 | -0.00003700 |
| H  | 2.72150100  | -0.94022900 | 1.36593200  |
| H  | 2.72153100  | -0.94029000 | -1.36598000 |

|                          |             |             |             |
|--------------------------|-------------|-------------|-------------|
| H                        | 2.63948000  | 1.42801600  | -0.00016800 |
| MDA-AlF <sub>3</sub> -a  |             |             |             |
| C                        | -1.00603300 | 1.03161100  | -0.00077600 |
| O                        | -0.33434200 | -0.04814000 | -0.00027600 |
| H                        | -1.59247400 | -1.23662200 | 0.00004500  |
| C                        | -2.41046300 | 1.02452900  | 0.00022800  |
| C                        | -3.11012900 | -0.15779600 | -0.00020600 |
| H                        | -4.19310500 | -0.17705000 | -0.00062300 |
| O                        | -2.57452100 | -1.34998800 | -0.00008000 |
| H                        | -0.45242900 | 1.97018700  | -0.00171700 |
| H                        | -2.94929100 | 1.95698000  | 0.00030400  |
| Al                       | 1.57921700  | -0.07868700 | -0.00009800 |
| F                        | 1.84447100  | 1.58116600  | 0.00056500  |
| F                        | 1.91709000  | -0.88485200 | -1.42112800 |
| F                        | 1.91489700  | -0.88471400 | 1.42174700  |
| MDA-AlCl <sub>3</sub> -a |             |             |             |
| C                        | -1.00603300 | 1.03161100  | -0.00077600 |
| O                        | -0.33434200 | -0.04814000 | -0.00027600 |
| H                        | -1.59247400 | -1.23662200 | 0.00004500  |
| C                        | -2.41046300 | 1.02452900  | 0.00022800  |
| C                        | -3.11012900 | -0.15779600 | -0.00020600 |
| H                        | -4.19310500 | -0.17705000 | -0.00062300 |
| O                        | -2.57452100 | -1.34998800 | -0.00008000 |
| H                        | -0.45242900 | 1.97018700  | -0.00171700 |
| H                        | -2.94929100 | 1.95698000  | 0.00030400  |
| Al                       | 1.57921700  | -0.07868700 | -0.00009800 |
| F                        | 1.84447100  | 1.58116600  | 0.00056500  |
| F                        | 1.91709000  | -0.88485200 | -1.42112800 |
| F                        | 1.91489700  | -0.88471400 | 1.42174700  |
| MDA-AlBr <sub>3</sub> -a |             |             |             |
| C                        | -2.01667000 | 1.26686700  | 0.00194500  |
| O                        | -1.35443700 | 0.17915000  | 0.00078000  |
| H                        | -2.62387300 | -1.01330000 | -0.00076000 |
| C                        | -3.41799300 | 1.26665900  | 0.00190700  |
| C                        | -4.12787900 | 0.08799700  | 0.00049400  |
| H                        | -5.21113500 | 0.08059100  | 0.00039800  |
| O                        | -3.60735800 | -1.10871400 | -0.00089300 |
| H                        | -1.45245300 | 2.19976800  | 0.00291300  |
| H                        | -3.95184600 | 2.20214500  | 0.00294000  |
| Al                       | 0.53404900  | -0.05401200 | 0.00008900  |
| Br                       | 0.83685800  | -1.21364300 | 1.92629400  |

|    |            |             |             |
|----|------------|-------------|-------------|
| Br | 0.83602200 | -1.20753300 | -1.92997400 |
| Br | 1.28044200 | 2.10518600  | 0.00277100  |

#### MDA-BH<sub>3</sub>-b

|   |             |             |             |
|---|-------------|-------------|-------------|
| C | -1.81382500 | -0.00939700 | 0.00017500  |
| O | -1.41146300 | -1.26100800 | -0.00001500 |
| H | -0.42369100 | -1.25416600 | -0.00033700 |
| C | -0.99054500 | 1.08230300  | 0.00008100  |
| C | 0.41757700  | 0.93254600  | -0.00022700 |
| H | 1.07666200  | 1.80144000  | -0.00013100 |
| O | 0.95839300  | -0.20410100 | -0.00058700 |
| H | -2.89206700 | 0.09025600  | 0.00063500  |
| H | -1.42204900 | 2.06930800  | 0.00037100  |
| B | 2.60035400  | -0.36720700 | 0.00043100  |
| H | 2.99298300  | 0.77507900  | 0.00184200  |
| H | 2.80673200  | -0.97791700 | -1.01312600 |
| H | 2.80497500  | -0.97980000 | 1.01323300  |

#### MDA-BF<sub>3</sub>-b

|   |             |             |             |
|---|-------------|-------------|-------------|
| C | 2.82289900  | -0.10655500 | 0.00230100  |
| O | 2.31988000  | -1.31643000 | -0.00099400 |
| H | 1.33559100  | -1.23244500 | -0.00445800 |
| C | 2.09429700  | 1.05438700  | 0.00075800  |
| C | 0.68460400  | 1.02480700  | -0.00414700 |
| H | 0.10423400  | 1.94576700  | -0.00699900 |
| O | 0.05017700  | -0.06838900 | -0.00686100 |
| H | 3.90587100  | -0.09678500 | 0.00589000  |
| H | 2.60901100  | 2.00041400  | 0.00295200  |
| B | -1.64403600 | -0.10207000 | 0.00090000  |
| F | -1.91170700 | -0.84319600 | -1.10198900 |
| F | -1.99222300 | 1.21772000  | -0.08342000 |
| F | -1.90782400 | -0.69273300 | 1.19290700  |

#### MDA-BCl<sub>3</sub>-b

|   |             |             |             |
|---|-------------|-------------|-------------|
| C | 3.33404900  | -0.09773700 | 0.00000300  |
| O | 2.83870900  | -1.30431800 | 0.00007500  |
| H | 1.85243500  | -1.24102600 | 0.00007300  |
| C | 2.60640300  | 1.07124300  | -0.00001000 |
| C | 1.20793700  | 1.05042400  | 0.00000600  |
| H | 0.62105100  | 1.96664000  | -0.00002100 |
| O | 0.58057800  | -0.05997400 | 0.00007500  |
| H | 4.41726400  | -0.08468400 | 0.00000800  |
| H | 3.12686700  | 2.01408700  | -0.00004300 |
| B | -1.00819500 | -0.07028300 | 0.00000800  |

|    |             |             |             |
|----|-------------|-------------|-------------|
| Cl | -1.50730000 | 0.81369600  | -1.51828700 |
| Cl | -1.41003200 | -1.83528400 | -0.00000100 |
| Cl | -1.50744900 | 0.81377400  | 1.51821600  |

#### MDA-BBr<sub>3</sub>-b

|    |             |             |             |
|----|-------------|-------------|-------------|
| C  | -3.88516900 | -0.02720600 | 0.00004200  |
| O  | -3.39728100 | -1.23486700 | -0.00121700 |
| H  | -2.40976500 | -1.18077500 | -0.00130900 |
| C  | -3.15241300 | 1.14091400  | 0.00109100  |
| C  | -1.75711800 | 1.11507200  | 0.00087600  |
| H  | -1.15968700 | 2.02410600  | 0.00165500  |
| O  | -1.13943400 | -0.00463000 | -0.00058900 |
| H  | -4.96837700 | -0.00826200 | 0.00033000  |
| H  | -3.67021200 | 2.08522100  | 0.00220100  |
| B  | 0.42606000  | -0.04535200 | -0.00038300 |
| Br | 1.00454200  | 0.89848800  | -1.64463000 |
| Br | 1.00449000  | 0.89696400  | 1.64518400  |
| Br | 0.82352900  | -1.97117300 | -0.00051300 |

#### MDA-AlH<sub>3</sub>-b

|    |             |             |             |
|----|-------------|-------------|-------------|
| C  | 2.29990900  | -0.10717900 | 0.00001600  |
| O  | 1.79961900  | -1.31919400 | -0.00005600 |
| H  | 0.81415500  | -1.22752700 | -0.00021400 |
| C  | 1.56132800  | 1.04692200  | 0.00011000  |
| C  | 0.14999900  | 0.99945000  | -0.00003900 |
| H  | -0.43434300 | 1.92194600  | -0.00015900 |
| O  | -0.48296200 | -0.09428100 | -0.00015000 |
| H  | 3.38289000  | -0.09203800 | 0.00021000  |
| H  | 2.06583000  | 1.99862700  | 0.00027000  |
| Al | -2.48115100 | -0.18478700 | 0.00011900  |
| H  | -2.72948300 | -0.96571600 | 1.36633900  |
| H  | -2.72967200 | -0.96409100 | -1.36701600 |
| H  | -2.71508200 | 1.40366200  | 0.00015800  |

#### MDA-AlF<sub>3</sub>-b

|   |            |             |             |
|---|------------|-------------|-------------|
| C | 3.11082100 | -0.15730700 | -0.00029300 |
| O | 2.57597200 | -1.34975500 | -0.00062500 |
| H | 1.59400200 | -1.23675700 | -0.00029100 |
| C | 2.41048800 | 1.02458800  | 0.00023600  |
| C | 1.00592100 | 1.03117900  | 0.00065600  |
| H | 0.45231500 | 1.96976000  | 0.00079100  |
| O | 0.33439600 | -0.04853700 | 0.00047100  |
| H | 4.19382000 | -0.17589900 | -0.00087500 |
| H | 2.94882200 | 1.95732200  | 0.00023300  |

|    |             |             |             |
|----|-------------|-------------|-------------|
| Al | -1.57975400 | -0.07887000 | 0.00006700  |
| F  | -1.91610600 | -0.88493600 | 1.42154600  |
| F  | -1.91676700 | -0.88419400 | -1.42152700 |
| F  | -1.84473600 | 1.58095900  | -0.00036400 |

#### MDA-AlCl<sub>3</sub>-b

|    |             |             |             |
|----|-------------|-------------|-------------|
| C  | 3.59549600  | -0.13916000 | 0.00007300  |
| O  | 3.02557900  | -1.31357600 | 0.00016600  |
| H  | 2.04729000  | -1.17620000 | 0.00017000  |
| C  | 2.93428800  | 1.06688700  | 0.00002800  |
| C  | 1.53327200  | 1.12468700  | 0.00003300  |
| H  | 1.01286900  | 2.08244400  | -0.00009700 |
| O  | 0.82494900  | 0.06718300  | 0.00015300  |
| H  | 4.67750100  | -0.19122800 | 0.00004400  |
| H  | 3.50532400  | 1.98012300  | -0.00005300 |
| Al | -1.07674900 | -0.06182300 | 0.00000500  |
| Cl | -1.42515400 | -1.12244200 | -1.79772200 |
| Cl | -1.64477500 | 1.99213700  | -0.00214400 |
| Cl | -1.42582500 | -1.11879900 | 1.79966200  |

#### MDA-AlBr<sub>3</sub>-b

|    |             |             |             |
|----|-------------|-------------|-------------|
| C  | -4.12800900 | -0.08798800 | -0.00201000 |
| O  | -3.60756500 | 1.10876300  | -0.00189000 |
| H  | -2.62408200 | 1.01340900  | -0.00155200 |
| C  | -3.41803100 | -1.26659700 | -0.00171200 |
| C  | -2.01670100 | -1.26676400 | -0.00119400 |
| H  | -1.45252200 | -2.19969200 | -0.00081300 |
| O  | -1.35445900 | -0.17905500 | -0.00112500 |
| H  | -5.21126300 | -0.08066800 | -0.00234800 |
| H  | -3.95179000 | -2.20214100 | -0.00180100 |
| Al | 0.53407400  | 0.05405600  | 0.00014700  |
| Br | 0.83451800  | 1.21143800  | 1.92813300  |
| Br | 0.83848900  | 1.20961800  | -1.92824300 |
| Br | 1.28040300  | -2.10514800 | 0.00177300  |

#### MDA-BH<sub>3</sub>-c

|   |             |             |             |
|---|-------------|-------------|-------------|
| C | -0.88405700 | -0.70467600 | 0.47256000  |
| O | -0.35519400 | -1.63517600 | -0.26664000 |
| H | 0.55539300  | -1.29398800 | -0.52037100 |
| C | -0.26852700 | 0.50416200  | 0.74762700  |
| C | 1.11074700  | 0.69197400  | 0.32334600  |
| H | 1.61093900  | 1.61903700  | 0.62840500  |
| O | 1.71220200  | -0.13296500 | -0.37177600 |
| H | -1.87180000 | -0.93921800 | 0.85038100  |

|   |             |            |             |
|---|-------------|------------|-------------|
| H | -0.68435100 | 1.13443400 | 1.51800000  |
| B | -1.24022400 | 1.29164400 | -0.76949200 |
| H | -2.39636300 | 1.14171200 | -0.48846200 |
| H | -0.80904400 | 0.67804700 | -1.70093500 |
| H | -0.80869700 | 2.39812800 | -0.59342900 |

MDA-BF<sub>3</sub>-c

|   |             |             |             |
|---|-------------|-------------|-------------|
| C | 1.13486500  | -1.18310800 | 0.59923400  |
| O | 1.80433600  | -1.36920600 | -0.51933000 |
| H | 2.03727200  | -0.45017200 | -0.84342500 |
| C | 0.85705900  | 0.04737100  | 1.12300800  |
| C | 1.34255500  | 1.22407400  | 0.45197600  |
| H | 1.12867800  | 2.20001700  | 0.90576700  |
| O | 1.98450000  | 1.17856000  | -0.61120300 |
| H | 0.81149700  | -2.10208300 | 1.07385400  |
| H | 0.32237800  | 0.12569600  | 2.05645700  |
| B | -1.68241700 | 0.03590100  | -0.21538200 |
| F | -2.11669500 | -1.02204200 | 0.44481100  |
| F | -1.88836900 | 1.24397900  | 0.27748600  |
| F | -1.12885800 | -0.10613800 | -1.40193900 |

MDA-BCl<sub>3</sub>-c

|    |             |             |             |
|----|-------------|-------------|-------------|
| C  | -1.69367400 | -1.18705000 | -0.79370700 |
| O  | -2.39908200 | -1.37270000 | 0.30469300  |
| H  | -2.61754300 | -0.45115600 | 0.63314500  |
| C  | -1.37445900 | 0.04338200  | -1.29103900 |
| C  | -1.84213200 | 1.21946900  | -0.61139400 |
| H  | -1.58990200 | 2.19711000  | -1.04190400 |
| O  | -2.51153500 | 1.17543500  | 0.43634900  |
| H  | -1.37896000 | -2.10693000 | -1.27231700 |
| H  | -0.80099700 | 0.12342800  | -2.20093500 |
| B  | 1.31450800  | 0.02094100  | 0.24401100  |
| Cl | 1.90021600  | -1.40217600 | -0.57930000 |
| Cl | 1.64496800  | 1.59965000  | -0.42521600 |
| Cl | 0.48784000  | -0.12358200 | 1.76395500  |

MDA-BBr<sub>3</sub>-c

|   |             |             |             |
|---|-------------|-------------|-------------|
| C | -1.96777800 | -1.19484200 | -1.28416000 |
| O | -2.88029600 | -1.41419300 | -0.35848200 |
| H | -3.16758800 | -0.50262300 | -0.05517200 |
| C | -1.56275100 | 0.05065100  | -1.66929400 |
| C | -2.17258500 | 1.20473800  | -1.07000700 |
| H | -1.85026700 | 2.19477600  | -1.41667900 |
| O | -3.03892100 | 1.12782100  | -0.18016400 |

|    |             |             |             |
|----|-------------|-------------|-------------|
| H  | -1.55377400 | -2.09906300 | -1.71431600 |
| H  | -0.81726600 | 0.15868800  | -2.44104400 |
| B  | 0.77016100  | 0.01478500  | 0.28921400  |
| Br | -0.38805500 | -0.19678500 | 1.75918900  |
| Br | 1.57838700  | -1.49622100 | -0.52148200 |
| Br | 1.24139700  | 1.75306400  | -0.30539100 |

MDA-AlH<sub>3</sub>-c

|    |             |             |             |
|----|-------------|-------------|-------------|
| C  | -0.45663400 | 1.18208300  | 0.50863500  |
| O  | -1.28654600 | 1.38448300  | -0.47722200 |
| H  | -1.57555000 | 0.47046800  | -0.78028900 |
| C  | -0.08649200 | -0.06807500 | 0.95323000  |
| C  | -0.74259900 | -1.23355000 | 0.38997000  |
| H  | -0.50926300 | -2.21184900 | 0.82500800  |
| O  | -1.54015200 | -1.15222000 | -0.55373800 |
| H  | -0.06134300 | 2.08898600  | 0.95238400  |
| H  | 0.50518500  | -0.15337500 | 1.85373100  |
| Al | 1.97418600  | -0.08057500 | -0.34410200 |
| H  | 1.32772700  | 0.19179000  | -1.76708400 |
| H  | 2.70713100  | 1.10124800  | 0.42750400  |
| H  | 2.26963100  | -1.58064200 | 0.09873800  |

MDA-AlF<sub>3</sub>-c

|    |             |             |             |
|----|-------------|-------------|-------------|
| C  | 1.12069200  | -1.18960600 | 0.60799700  |
| O  | 2.00788700  | -1.35406800 | -0.31935600 |
| H  | 2.28101300  | -0.42342200 | -0.60754000 |
| C  | 0.65850300  | 0.05417200  | 1.01068500  |
| C  | 1.33883200  | 1.23891200  | 0.50021300  |
| H  | 1.06040300  | 2.21058800  | 0.92055700  |
| O  | 2.19954600  | 1.16806500  | -0.38449600 |
| H  | 0.73707400  | -2.10907600 | 1.03723500  |
| H  | 0.07007500  | 0.11528700  | 1.91814900  |
| Al | -1.26697200 | 0.02394400  | -0.17662400 |
| F  | -0.69448700 | -0.21386500 | -1.72198000 |
| F  | -1.74787700 | 1.56393700  | 0.24580600  |
| F  | -2.00714300 | -1.26535000 | 0.58119200  |

MDA-AlCl<sub>3</sub>-c

|   |             |             |             |
|---|-------------|-------------|-------------|
| C | -1.46735200 | -1.20079900 | -0.87983600 |
| O | -2.46113400 | -1.35208000 | -0.07004100 |
| H | -2.74816900 | -0.41429300 | 0.19280600  |
| C | -0.92758300 | 0.04035500  | -1.20208500 |
| C | -1.67311700 | 1.22857600  | -0.79367400 |
| H | -1.35333200 | 2.19593900  | -1.19374000 |

|    |             |             |             |
|----|-------------|-------------|-------------|
| O  | -2.63288300 | 1.16182300  | -0.01751200 |
| H  | -1.05576300 | -2.12361000 | -1.27497600 |
| H  | -0.25532400 | 0.09520300  | -2.05073100 |
| Al | 0.86489700  | 0.01331900  | 0.18172800  |
| Cl | 1.90816400  | -1.66026200 | -0.59028500 |
| Cl | 1.61897800  | 1.92694500  | -0.31570700 |
| Cl | -0.03717900 | -0.19686600 | 2.07764800  |

#### MDA-AlBr<sub>3</sub>-c

|    |             |             |             |
|----|-------------|-------------|-------------|
| C  | 1.47806800  | -1.22765300 | 1.55283900  |
| O  | 2.66358800  | -1.40975800 | 1.07743800  |
| H  | 3.03359100  | -0.48110200 | 0.89639100  |
| C  | 0.89132100  | 0.02856900  | 1.67837000  |
| C  | 1.75197400  | 1.19613700  | 1.50013800  |
| H  | 1.34859000  | 2.17448000  | 1.77916500  |
| O  | 2.89708900  | 1.09880800  | 1.04496500  |
| H  | 0.94805900  | -2.13488200 | 1.82286500  |
| H  | 0.00098700  | 0.11014400  | 2.29183100  |
| Al | -0.41306500 | 0.01040300  | -0.16561100 |
| Br | -1.75983700 | -1.75621900 | 0.30736200  |
| Br | -1.31263800 | 2.07777100  | 0.09373500  |
| Br | 1.09604700  | -0.24436900 | -1.82980000 |

#### BH<sub>2</sub>-MDA-BH<sub>3</sub>-a

|   |             |             |             |
|---|-------------|-------------|-------------|
| C | -0.36612900 | -0.79449600 | -0.00000700 |
| O | -1.26309800 | 0.08451100  | 0.00024400  |
| H | -0.35417300 | 1.52091400  | -0.00000300 |
| C | 1.02700700  | -0.46580500 | 0.00003400  |
| C | 1.38706100  | 0.87256900  | -0.00001800 |
| H | 2.43109500  | 1.16612900  | -0.00003500 |
| O | 0.56821600  | 1.88693800  | -0.00006400 |
| H | -0.68530500 | -1.83804900 | -0.00029300 |
| B | 2.11101400  | -1.53751900 | -0.00000400 |
| H | 1.81059800  | -2.68817800 | -0.00004800 |
| H | 3.25433700  | -1.20670300 | -0.00001700 |
| B | -2.87184100 | -0.31580700 | -0.00010500 |
| H | -3.26415600 | 0.19463000  | 1.01335800  |
| H | -2.85316900 | -1.52202100 | -0.00018400 |
| H | -3.26367100 | 0.19471300  | -1.01372700 |

#### BH<sub>2</sub>-MDA-BF<sub>3</sub>-a

|   |             |             |            |
|---|-------------|-------------|------------|
| C | -0.84965900 | 0.69006300  | 0.00036400 |
| O | 0.03150700  | -0.28171300 | 0.00071100 |
| H | -0.52543700 | -1.14453000 | 0.00057400 |



|   |             |             |             |
|---|-------------|-------------|-------------|
| C | -2.21361700 | 0.47807100  | -0.00006200 |
| C | -2.64824500 | -0.90500900 | -0.00020100 |
| H | -3.72704700 | -1.10032400 | -0.00075600 |
| O | -1.86503400 | -1.87241100 | 0.00020200  |
| H | -0.41357300 | 1.68320400  | 0.00030900  |
| B | -3.16937900 | 1.66021400  | -0.00010800 |
| H | -2.72924500 | 2.76684500  | 0.00011700  |
| H | -4.34651400 | 1.47939200  | -0.00022400 |
| B | 2.33543000  | 0.09885800  | -0.00020900 |
| F | 2.12220100  | 1.40833100  | 0.00003500  |
| F | 2.54090700  | -0.52774500 | -1.14379300 |
| F | 2.54232500  | -0.52788600 | 1.14305400  |

BH<sub>2</sub>-MDA-AlH<sub>3</sub>-a

|    |             |             |             |
|----|-------------|-------------|-------------|
| C  | 0.07267600  | -0.74052700 | 0.00084700  |
| O  | -0.78195000 | 0.18549700  | 0.00135200  |
| H  | 0.21221600  | 1.55410100  | 0.00056700  |
| C  | 1.47969400  | -0.49604100 | -0.00005000 |
| C  | 1.91528400  | 0.82189700  | -0.00033000 |
| H  | 2.97401900  | 1.05796400  | -0.00087700 |
| O  | 1.15247600  | 1.87622600  | -0.00008500 |
| H  | -0.29559900 | -1.76933700 | 0.00091700  |
| B  | 2.49746700  | -1.63267900 | -0.00041400 |
| H  | 3.65856900  | -1.37203100 | -0.00105300 |
| H  | 2.12595000  | -2.76191400 | -0.00005700 |
| Al | -2.76617300 | -0.14920300 | -0.00057900 |
| H  | -3.15896800 | 0.57002400  | 1.36493100  |
| H  | -3.15511600 | 0.56718900  | -1.36871900 |
| H  | -2.65829500 | -1.74871800 | 0.00094400  |
